# Supplementary material for: Potential to Reduce Chemical Fertilizer Application in Tea Plantations at Various Spatial Scales
Source: MDPI journal article supplement (doi:10.3390/ijerph19095243), 2022-04-26
Supplement: s1 [file s1]

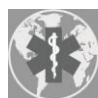

## Supplementary Materials

**Table S1.** Average planting area of crops and amount of fertilizer applied in all regions of Zhejiang Province from 2008 to 2017.

| Cities        | Crop sown area (thousand hectares) | Nitrogen fertilizer application (10,000 tons) | Phosphate fertilizer application (10,000 tons) | Potassium fertilizer application (10,000 tons) | Compound fertilizer application (10,000 tons) | Total fertilizer application (10,000 tons) |
|---------------|------------------------------------|-----------------------------------------------|------------------------------------------------|------------------------------------------------|-----------------------------------------------|--------------------------------------------|
| Hangzhou      | 345.74                             | 5.13                                          | 1.19                                           | 0.8                                            | 3.43                                          | 10.55                                      |
| Ningbo        | 302.04                             | 5.03                                          | 1.53                                           | 0.85                                           | 3.57                                          | 10.98                                      |
| Jiaxing       | 326.27                             | 7.74                                          | 1.22                                           | 0.54                                           | 0.87                                          | 10.37                                      |
| Huzhou        | 204.37                             | 3.08                                          | 0.52                                           | 0.29                                           | 1.16                                          | 5.05                                       |
| Shaoxing      | 302.14                             | 7.06                                          | 0.84                                           | 0.67                                           | 2.02                                          | 10.59                                      |
| Zhoushan      | 21.09                              | 0.25                                          | 0.06                                           | 0.02                                           | 0.17                                          | 0.5                                        |
| Wenzhou       | 236.52                             | 4.93                                          | 1.38                                           | 0.86                                           | 1.28                                          | 8.45                                       |
| Jinhua        | 250                                | 4.9                                           | 1.61                                           | 1.12                                           | 3.42                                          | 11.05                                      |
| Yiwu          | 27.27                              | 0.53                                          | 0.14                                           | 0.1                                            | 0.51                                          | 1.28                                       |
| Quzhou        | 214.65                             | 3.91                                          | 0.88                                           | 0.85                                           | 1.73                                          | 7.37                                       |
| Taizhou       | 239.8                              | 4.71                                          | 0.92                                           | 0.51                                           | 2.84                                          | 8.98                                       |
| Lishui        | 168.73                             | 2.63                                          | 0.94                                           | 0.62                                           | 1.9                                           | 6.09                                       |
| All provinces | 2613.55                            | 49.37                                         | 11.08                                          | 7.13                                           | 22.38                                         | 89.96                                      |

**Table S2.** Specific rating criteria for climate factors, soil factors and topographic factors.

| Climate factor     | Annual average illumination            | Annual average precipitation                     | Annual average temperature     | Annual average relative humidity | Factor rating |
|--------------------|----------------------------------------|--------------------------------------------------|--------------------------------|----------------------------------|---------------|
|                    | 34-37%                                 | 1000-1300 mm                                     | 18-19°C                        | 75.5-77%                         | 1             |
|                    | 37-40%                                 | 1300-1600 mm                                     | 17-18°C                        | 77-78%                           | 2             |
|                    | 40-45%                                 | 1600-2000 mm                                     | 16-17°C                        | 78-79.5%                         | 3             |
| Soil factor        | Land use type                          | Soil type                                        | Soil texture                   | Soil erosion degree              | Factor rating |
|                    | e.g., woodland and shrubland           | e.g., yellow brown soil and red soil             | Percentage of loam, 0-20%      | Slight erosion                   | 1             |
|                    | e.g., paddy field and dry land         | e.g., lime soil and coarse bone soil             | Percentage of loam, 21-40%     | Moderate erosion                 | 2             |
|                    | e.g., high cover grass and tidal flats | e.g., mountain meadow soil and coastal salt soil | Percentage of loam, >40%       | Strength erosion                 | 3             |
| Topographic factor | Elevation                              | Slope                                            | Aspect                         |                                  | Factor rating |
|                    | 0-500 m                                | 0-20°                                            | Southeast, south, southwest    |                                  | 1             |
|                    | 500-1500 m                             | 20-40°                                           | East and west                  |                                  | 2             |
|                    | >1500 m                                | >40°                                             | Northeast, northwest and north |                                  | 3             |

**Table S3.** Rating of chemical fertilizer reduction potential in tea plantations of Zhejiang Province.

| Fertilizer reduction suitability  | Tea planting suitability             | Rating result | Area percentage |
|-----------------------------------|--------------------------------------|---------------|-----------------|
| Most suitable reduction area      | Most suitable tea planting area      | Class 1       | 16.6            |
|                                   | Subsuitable tea planting area        | Class 2       | 21.9            |
|                                   | Generally suitable tea planting area | Class 3       | 14.5            |
| Subsuitable reduction area        | Most suitable tea planting area      | Class 4       | 11              |
|                                   | Subsuitable tea planting area        | Class 5       | 16.5            |
|                                   | Generally suitable tea planting area | Class 6       | 13.7            |
| Generally suitable reduction area | Most suitable tea planting area      | Class 7       | 2.1             |
|                                   | Subsuitable tea planting area        | Class 8       | 2.1             |
|                                   | Generally suitable tea planting area | Class 9       | 1.6             |

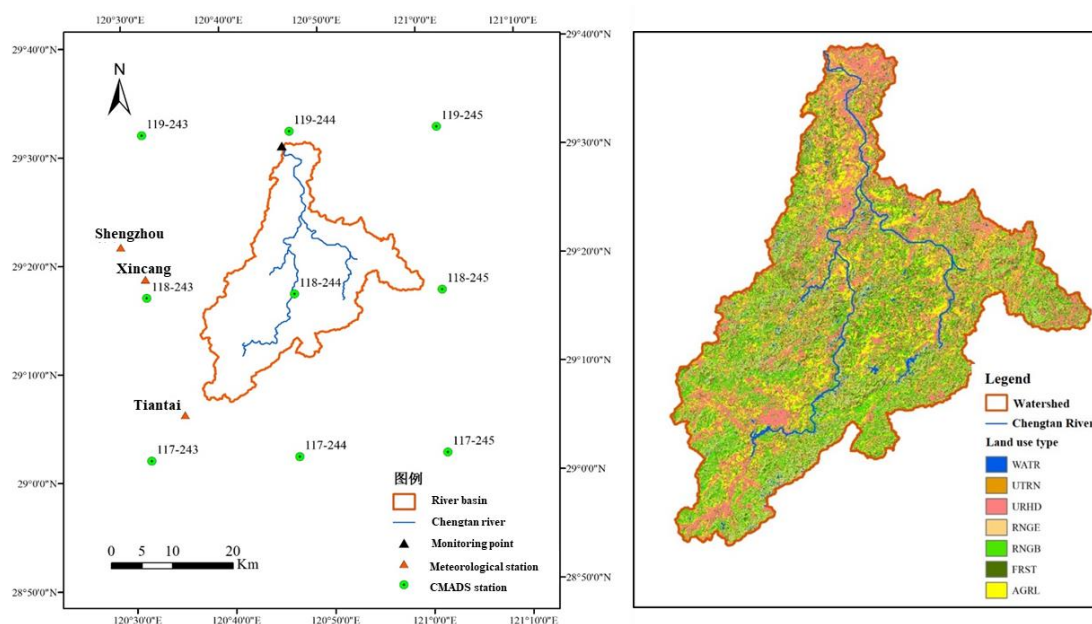

**Figure S1.** Distribution of monitoring points, meteorological stations and land use types in the studied basin.

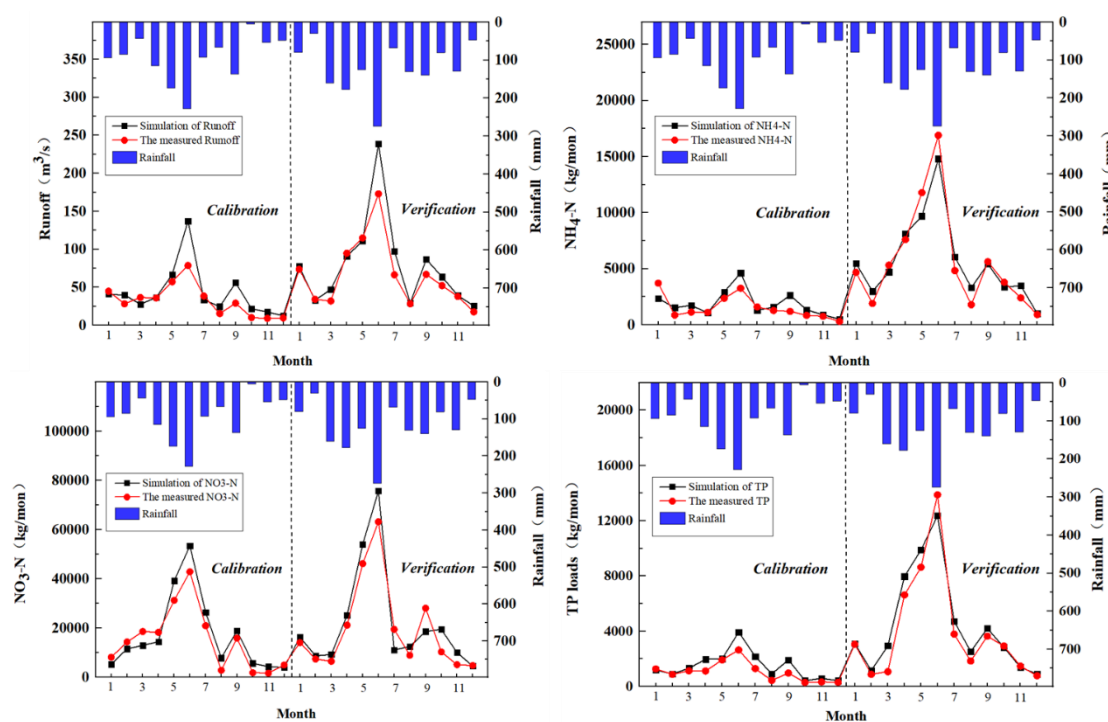

**Figure S2.** Runoff, NH<sub>4</sub>-N, NO<sub>3</sub>-N and TP load calibration and validation of the SWAT model.

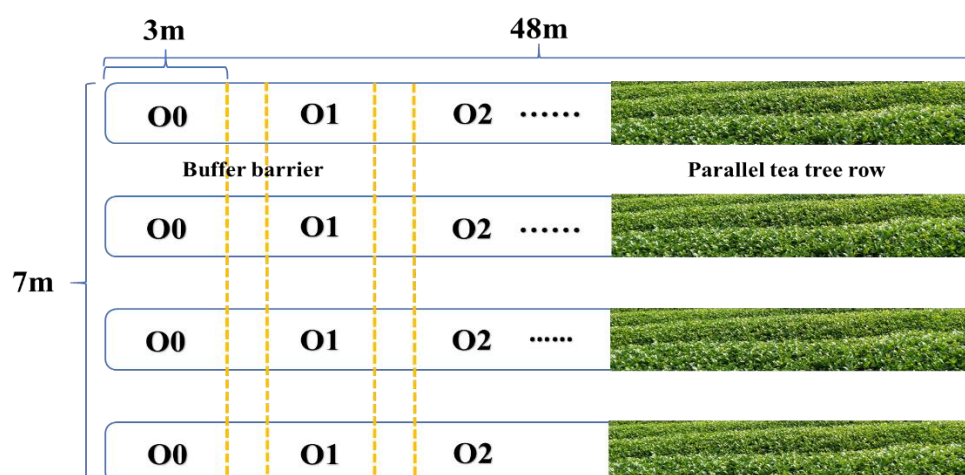

**Figure S3.** Schematic diagram of the tea garden field experiment layout.

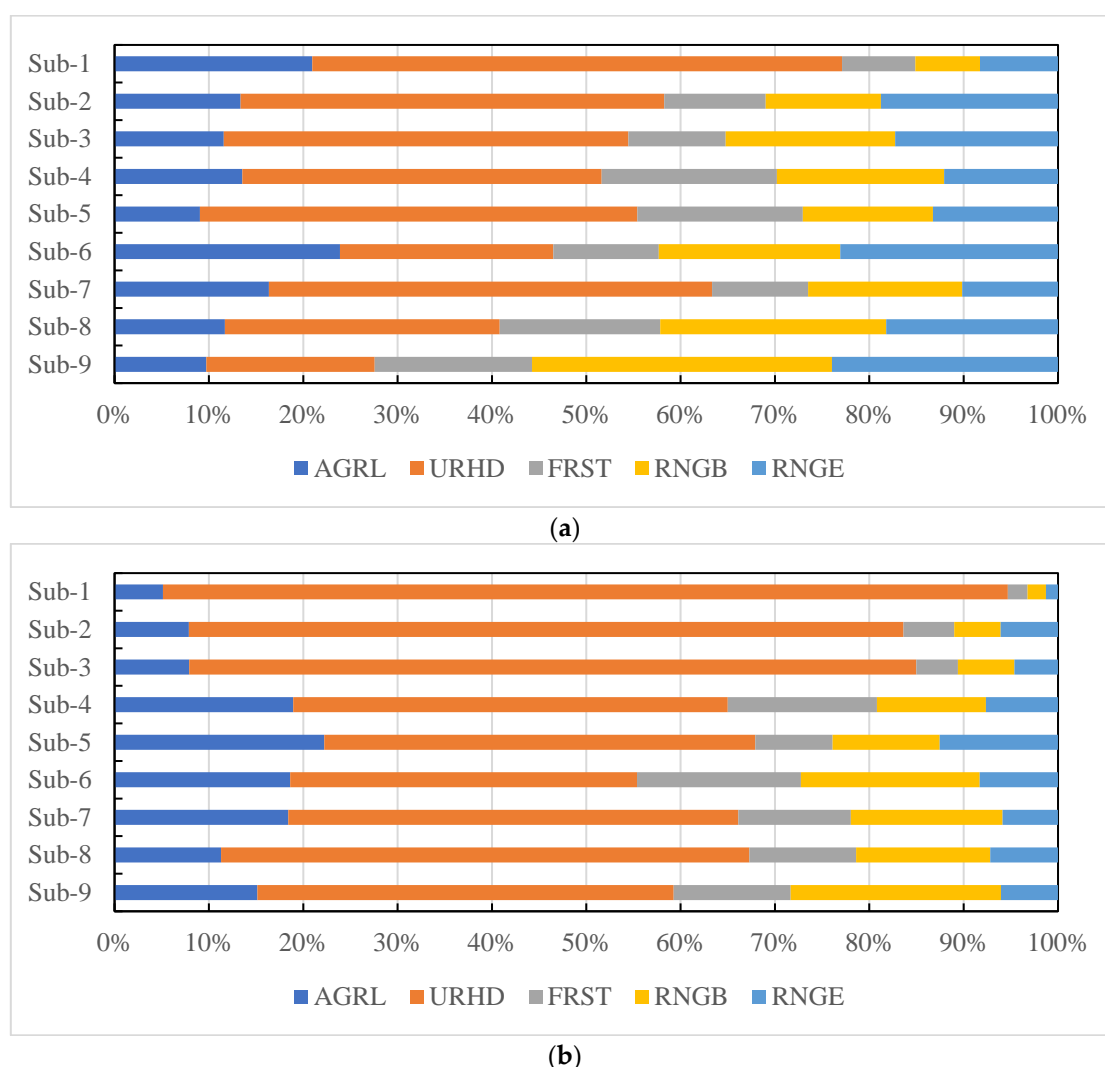

**Figure S4.** (a) Ratios of the total nitrogen load under different land use patterns in each subwatershed; (b) Ratios of the total phosphorus load under different land use patterns in each subwatershed. Note: arable land (AGRL), urban land (URHD), barren grassland (RNGE), tea plantation, land (RNGB) and forestland (FRST)
